# Supplementary material for: Prevalence and factors associated with having ever impregnated a teenage girl among young men (15-24 years) in Kampala and their early fatherhood experiences
Source: Research Square preprint supplement (doi:10.21203/rs.3.rs-7111985/v1), 2025-09-05
Supplement: Supplementary file 1 [file 1171e226a78376a0689c677b.docx]

**ADDITIONAL FILE 1: QUESTIONNAIRE FOR THE PREVALENCE AND FACTORS ASSOCIATED WITH ADOLESCENT PREGNANCY BY A YOUNG MAN IN KAMPALA**.

| **INTERVIEWER ADMININSTERED QUESTIONNAIRE**  **Description:** The questions below should be used to obtain information regarding the participants demographic, sexual behavioral practice, inter-personal relationship, and community factors.  **General Instructions:**   1. Unless instructed otherwise, select only one option 2. Specific instructions are written in ***(bold italics and parentheses****)* after a specific section or item   **Data Source: Participant.** | | | | |
| --- | --- | --- | --- | --- |
| **V**  **Code** | **Variable** | **Questions** | **Response lists/ options** |  |
|  | **DEMOGRAPHIC SECTION** | | |  |
| A101 | Date | Date when questionnaires is filled | | **d** | **d** | **m** | **m** | **m** | **y** | **y** | | --- | --- | --- | --- | --- | --- | --- | |  |
| A102 | Patient ID | What is the assigned Participants’ ID | |  |  |  |  |  |  |  | | --- | --- | --- | --- | --- | --- | --- | |  |
|  |  |  |  |  |
| A103 | Age | How old are you? ***(age in complete years)*** | |  |  | | --- | --- | |  |
| A104 | Occupation | What is your current job or work? | specify……………... |  |
| A105 | Education level | What is your highest level of education? | □1. No education  □2. Primary  □3. Secondary  □4. Tertiary |  |
| A106 | Religion | What religion do you attend? | □1. Catholic  □2. Anglican  □3. Muslim  □4. Others specify……………... |  |
| A107 | Marital status | What is your current marital status ***(select married only if legal or traditional married)?*** | □1. Single  □2. Married  □3. Cohabiting  □4.Others specify………………. |  |
| A108 | Alcohol use | Do you sometimes drink alcohol? | □1. No  □2. Yes |  |
| A109 | Frequency of alcohol consumption | If yes A108, how many number of times/ days in a week do you consumes alcohol? | □1. Once a week  □2. Twice a week  □3. Sometimes  □4. Most times  □5. Everyday |  |
| A110 | Drug use | Do you sometimes use of drugs ***(such as weed, tobacco, marijuana)?*** | □1. No  □2. Yes |  |
| A111 | Frequency of drug use | If yes in A110, how many number of times the participant uses drugs | □1. Once a week  □2. Twice a week  □3. Sometimes  □4. Most times  □5. Everyday |  |
|  | **BEHAVIORAL SEXUAL SECTION** | | |  |
| B200 | Affair with teenage girl | Have you had an affair with a teenage girl? (If response is no, skip to End) | □1. No if No Exit study  □2. Yes. |  |
| B201 | Age at first sex | How old were you when you first had a sexual encounter ***(age in completed years)?*** | |  |  | | --- | --- | |  |
| B202 | Ever impregnated a girl | Do you know of any teenage girl you have ever impregnated? | □1. No  □2. Yes, if yes how many…….  □3. Don’t know |  |
|  |  | ***If NO above,*** how do you prevent pregnancy? | 1.Luck  2.Condoms  3.Other contraceptives |  |
| B203 | Pregnancy outcome | Do you know any pregnancy outcome? | □1. Abortion  □2. Birthed a baby  □3. Others specify…......... |  |
| B204 | Sexual partners in the last 1 year | How many sexual partners have you been with in the last 1 year? | □1. 1  □2. 2-5  □3. >5 |  |
| B205 | Life time sexual partners | How many sexual partners have you had in a lifetime? | □1. 1  □2. 2-5  □3. >5 |  |
| B206 | Condom use | Do you use of condoms? | □1. No  □2. Yes |  |
| B207 | Frequency of condom use | How often do you use condoms during a sexual encounter? | □1. Never  □2. Sometimes  □3. Everyday |  |
| B208 | Condom use at first sex | Did you use a condom at the first sexual encounter? | □1. No  □2. Yes |  |
| B209 | Desire for sex first time | Where you willing to have sex at the first sexual encounter | □1. Really did not want to  □2. Did not want to  □3. Wanted to  □4. Really wanted to |  |
| B210 | Had sex in the last 30 days | Have you had a sexual encounter in the last 30 days | □1. No  □2. Yes |  |
| B211 | Prevention used last sex | During the last sex act, did you use a pregnancy prevention method. | □1. Nothing  □2. Condoms  □3. Pills  □4. Others specify…………………. |  |
| B212 | Contraceptive method | Do you know any pregnancy prevention methods? ***(Probe to see which methods the respondent knows)*** | □1. No  □2. Yes, if yes name just one……………………. |  |
| B213 | Contraceptive access | Do you know where to get any contraceptive method | □1. No  □2. Yes, if yes name one place…………………. |  |
| B214 | Contraceptive responsibility | Who is responsible for contraception in a relationship? | □1. Male  □2. Female  □3. Both  □4. Unsure |  |
| B215 | Contraceptive usage | Do you discuss contraceptive usage with your partner? | □1. No  □2. Yes |  |
| B216 | Importance of contraceptives | Is use of contraceptives important when having sex with a teenage girl? | □1. No  □2. Yes  □3. Don’t know |  |
| B217 | Sex education_1 | Have you had about/do you know sex education? | □1. No  □2. Yes  □3. Don’t know |  |
| B218 | Sex education_2 | Do you think sex education can reduce teenage pregnancy? | □1. No  □2. Yes  □3. Don’t know |  |
|  |  |  |  |  |
|  | **INTER-PERSONAL RELATIONSHIP SECTION** | | |  |
| C301 | Peer influence | Have you received pressure from friends to engage in sexual activities? | □1. No  □2. Yes |  |
| C302 | History of teenager parents | At the time of your birth, were your parents <20 years? ***(Try to probe)*** | □1. No  □2. Yes |  |
| C303 | Father support | Is your father present to support you physical, psychological and financial? | □1. No  □2. Yes |  |
| C304 | History of pregnancy in the social network | Do your friends and colleges have a history of impregnating girls. | □1. No  □2. Yes |  |
| C305 | Parental support | Do you have any family support (physical, psychological and financial)? | □1. No  □2. Yes |  |
|  | **COMMUNITY FACTORS SECTION** | | |  |
| D401 | Cultural belief | Does your culture support marriage of teenage girls? | □1. No  □2. Yes  If yes, do you think its ok?  Yes  No |  |
| D402 | Religious practice | Does your religion support contraceptive use? | □1. No  □2. Yes |  |
| D042 |  | If yes in D402, please specify the religion | …………………………..  ………………………….. |  |
| D403 | Access to information | Are you able to contraceptive access information | □1. No  □2. Yes, if yes name the source ***(Tick all that applies).***  □1. Radio  □2. Television  □3. News papers  □4. Community mega phones (community Radio) |  |
| D404 | social norms | Is Impregnating a teenage girl in this community an acceptable behavior. ***(State the age bracket of teenage girl;<18yrs.)*** | □1. No  □2. Yes |  |
| D405 | Social norms_2 | If no in D404, what are/is the penalty/charge for impregnating a teenage girl in this community. | 1…………………………  2………………………….  3………………………… |  |
| D405 | Social norms_3 | Is it ok to marry a girl who is less than 18years old? | □1. No  □2. Yes  □3. Don’t know |  |
| D406 | Social norms_4 | Do you think ending child marriage can reduce teenage pregnancy? | □1. No  □2. Yes  □3. Don’t know |  |
| E501 | Closing remark | Thank you for filling this questionnaire. Use the space below to give any additional information |  |  |
